# Supplementary material for: A click strategy for the immobilization of palladium nanoparticles onto silica: efficient and recyclable catalysts for carbon–carbon bond formation under mild reaction conditions
Source: Royal Society of Chemistry journal article supplement (doi:10.1039/c6ra11734a), 2016-01-01
Supplement: c6ra11734a1.pdf [file c6ra11734a1.pdf]

# Supporting Information

## **A Click Strategy for the Immobilization of Palladium nanoparticles onto Silica: Efficient and recyclable catalysts for carbon–carbon bond formation under mild reaction conditions**

Abdol R. Hajipour<sup>1,2\*</sup>, Parisa Abolfathi<sup>1</sup>, Fatemeh Mohammadsaleh<sup>1</sup>

*<sup>1</sup>Pharmaceutical Research Laboratory, Department of Chemistry, Isfahan*

*University of Technology, Isfahan 84156, IR Iran, E-mail*

*<sup>2</sup>Department of Neuroscience, University of Wisconsin, Medical School, 1300 University*

*Avenue, Madison, 53706-1532, WI, USA*

---

\*Corresponding author: Tel.: + 98 313 391 3262; fax: + 98 313 391 2350; e-mail:

haji@cc.iut.ac.ir.

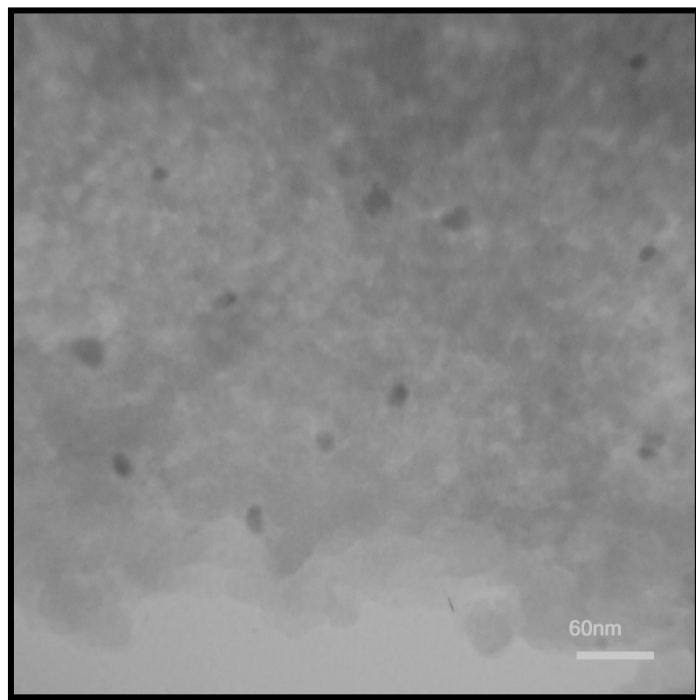

Fig S1 TEM micrograph of the recovered catalyst

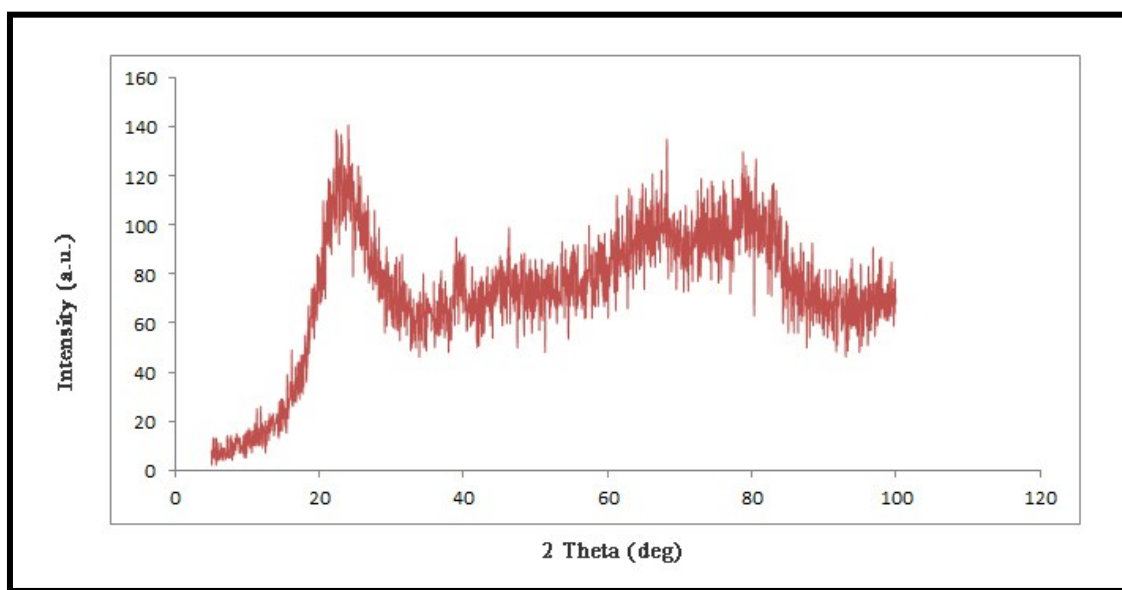

Fig S2 XRD pattern of the recovered catalyst

## <sup>1</sup>H-NMR, FT-IR and boiling points of most of products

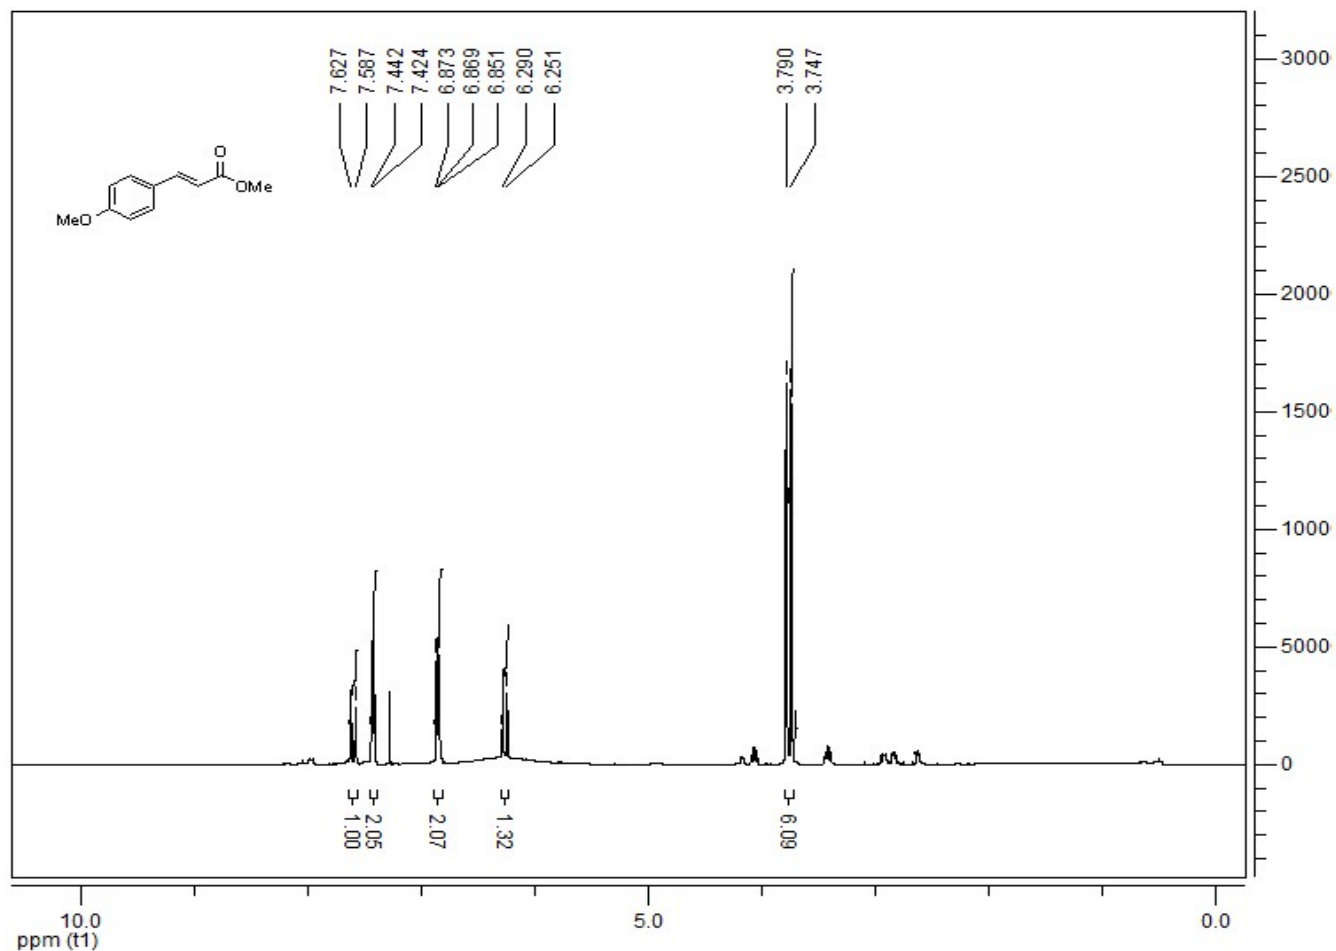

Pale yellow solid melting point: 86 °C

<sup>1</sup>H NMR (400 MHz, CDCl<sub>3</sub>, ppm, TMS): δ = 7.6 (d, J=16Hz, 1H), 7.43 (d, J=7.2Hz, 2H), 6.86(d, J=7.2, 2H), 6.27(d, J= 15.6, 1H), 3.79 (s, 3H), 3.74 (s, 3H)

IR (KBr, cm<sup>-1</sup>):3032, 3000, 2964, 2844, 1707, 1639, 1595, 1289, 1206, 1026, 969, 837, 538

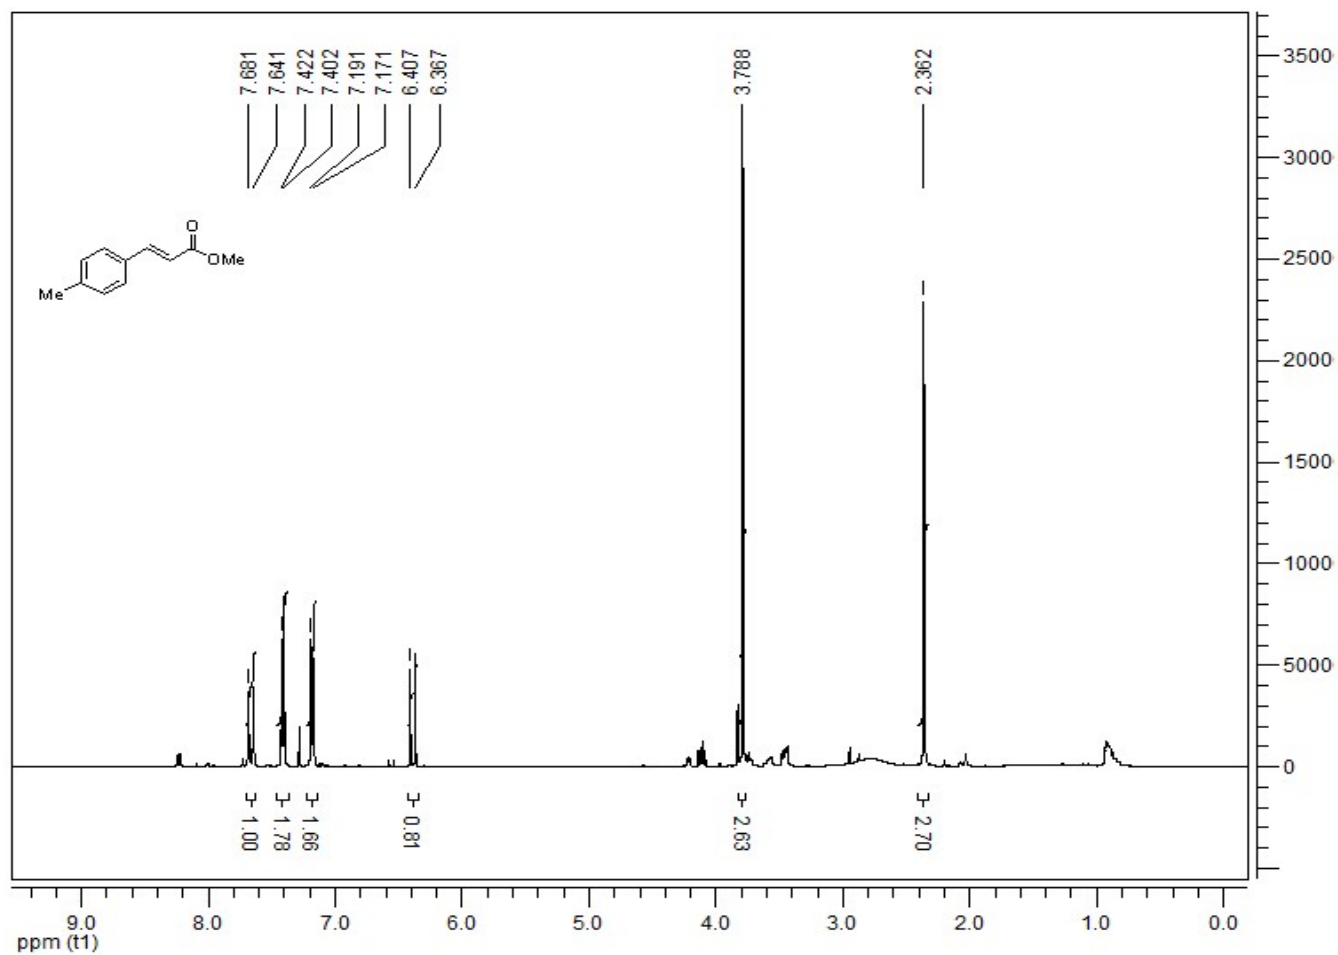

$^1\text{H}$  NMR (400 MHz,  $\text{CDCl}_3$ , ppm, TMS):  $\delta = 7.6$  (d,  $J=16\text{Hz}$ , 1H), 7.35 (d,  $J= 8 \text{ Hz}$ , 2H), 7.12 (d,  $J= 7.6$ , 2H), 6.33 (d,  $J=16,1\text{H}$ ), 3.78 (s, 3H), 2.36 (s, 3H)

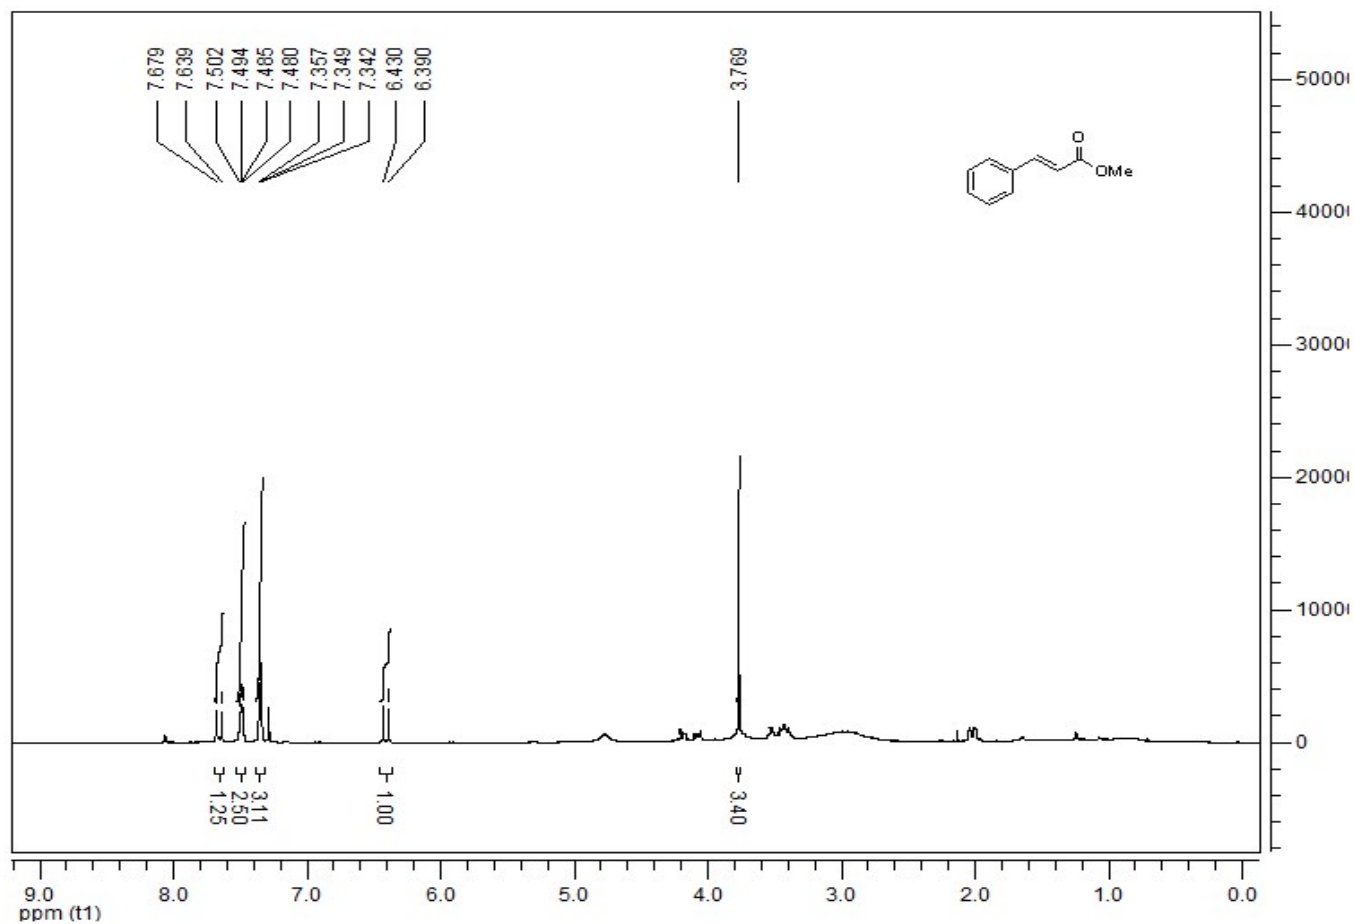

Pale yellow solid melting point: 34°C

$^1\text{H NMR}$  (400 MHz,  $\text{CDCl}_3$ , ppm, TMS):  $\delta$  = 7.65(d,  $J$ =16Hz, 1H), 7.48(m, 5H), 6.41(d,  $J$ =16 Hz, 1H), 3.76 (s, 3H)

IR (KBr,  $\text{cm}^{-1}$ ):  $\nu$  = 3062, 2949, 2843, 1718, 1637, 1450, 1202, 1170, 768, 684

---

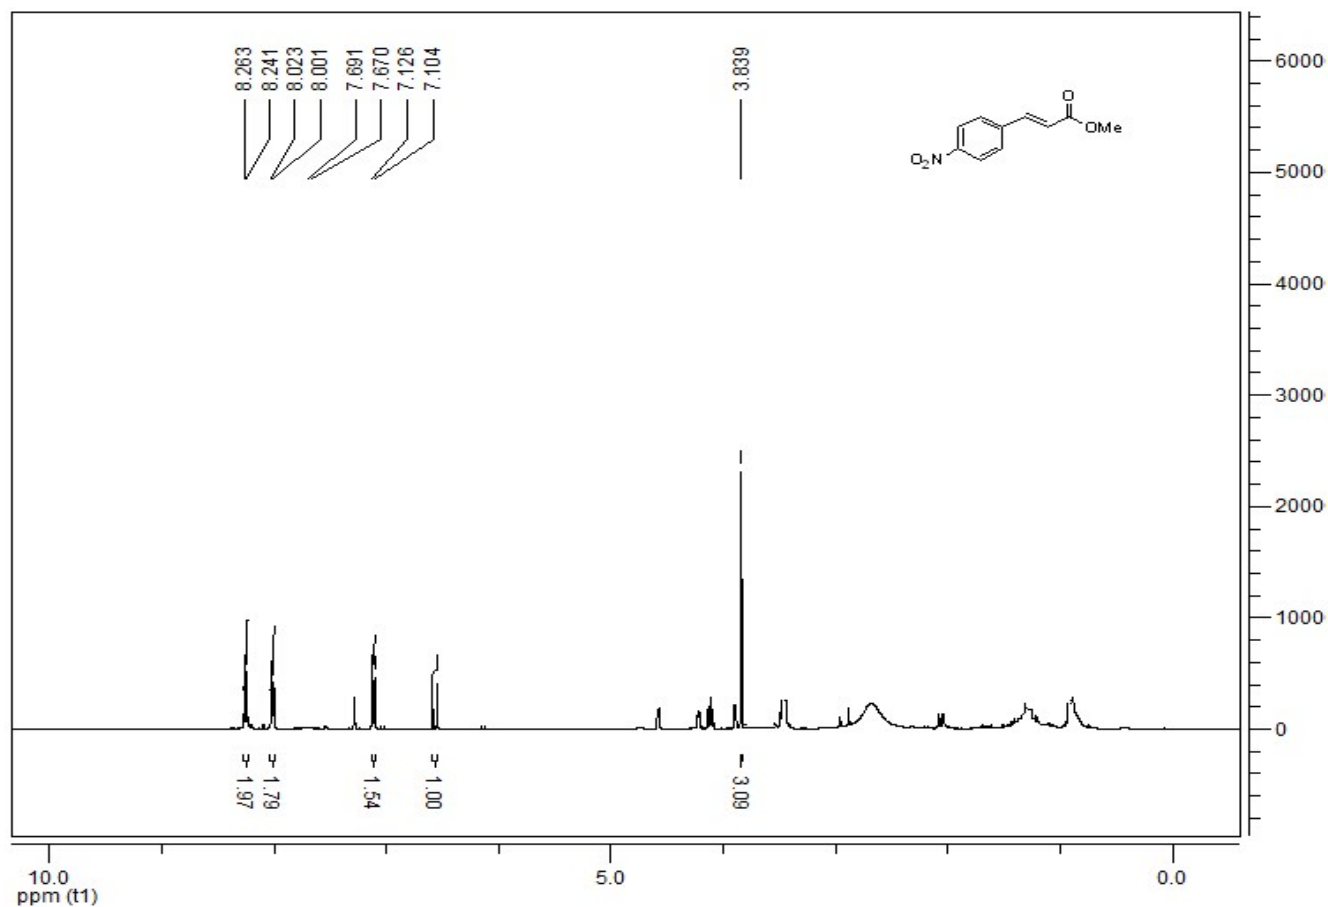

Pale yellow solid melting point: 160°C

$^1\text{H NMR}$  (400 MHz,  $\text{CDCl}_3$ , ppm, TMS):  $\delta = 8.25(\text{d}, J = 8.8 \text{ Hz}, 2\text{H}), 8.01(\text{d}, 8.8 \text{ Hz}, 2\text{H}), 7.68$   
 $(\text{d}, J = 8.4 \text{ Hz}, 1\text{H}), 7.11 (\text{d}, J = 8.8 \text{ Hz}, 1\text{H}), 3.83 (\text{s}, 3\text{H})$

IR (KBr,  $\text{cm}^{-1}$ ):  $\nu = 2963, 1724, 1646, 1514, 1346, 851$

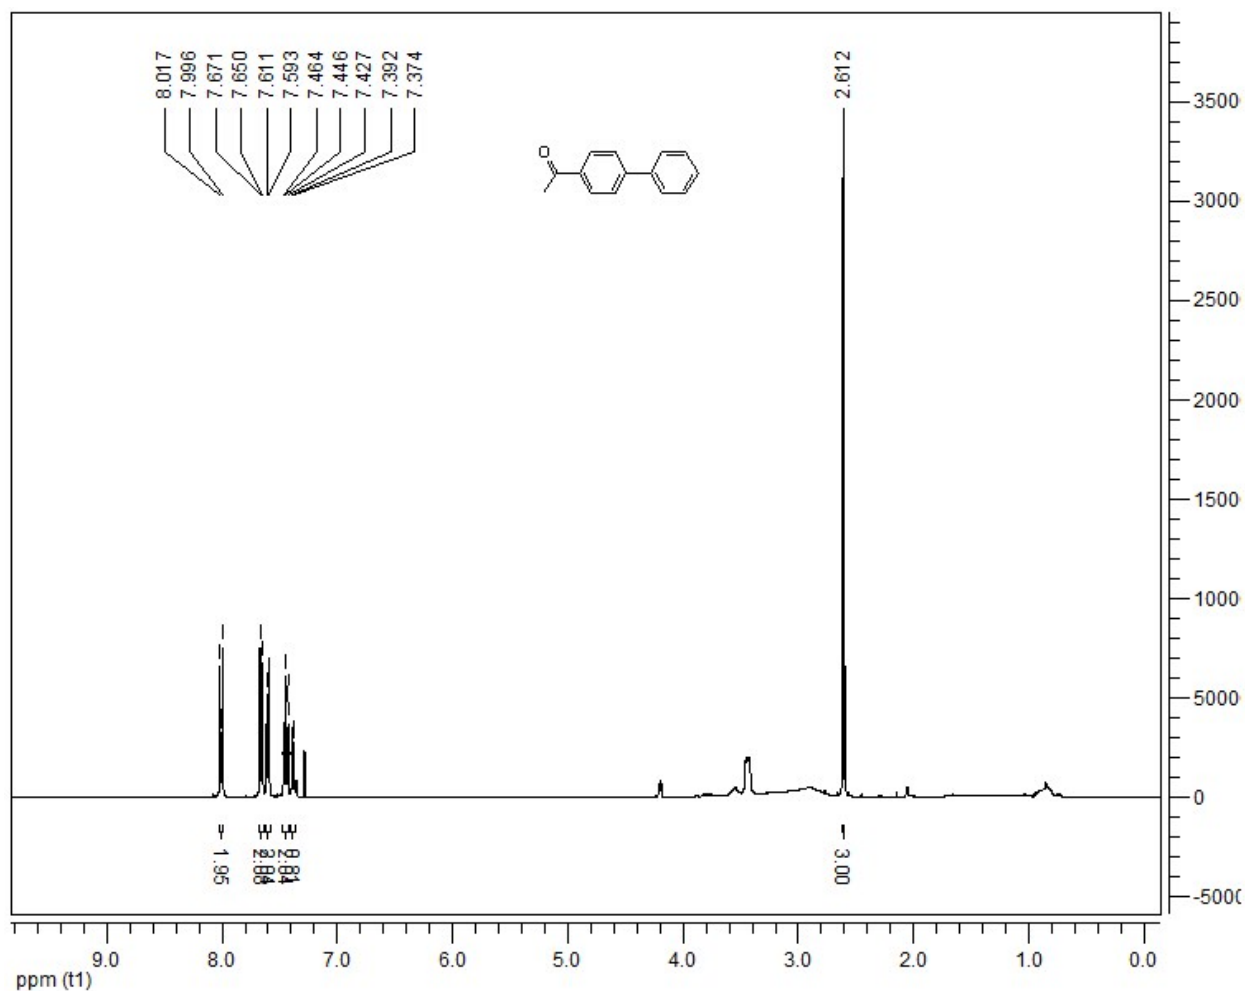

White solid, melting point: 121°C

$^1\text{H NMR}$  (400 MHz,  $\text{CDCl}_3$ , ppm, TMS):  $\delta$  = 8 (d,  $J$ =8.4 Hz, 2H), 7.66 (d,  $J$ = 8.4 Hz, 2H), 7.59-7.61 (m, 2H), 7.37-7.46 (m, 3H), 2.61(s, 3H)

FT-IR (KBr,  $\text{cm}^{-1}$ ):  $\nu$  = 2918, 1726, 1669, 1410, 1268, 1120, 768, 690, 591

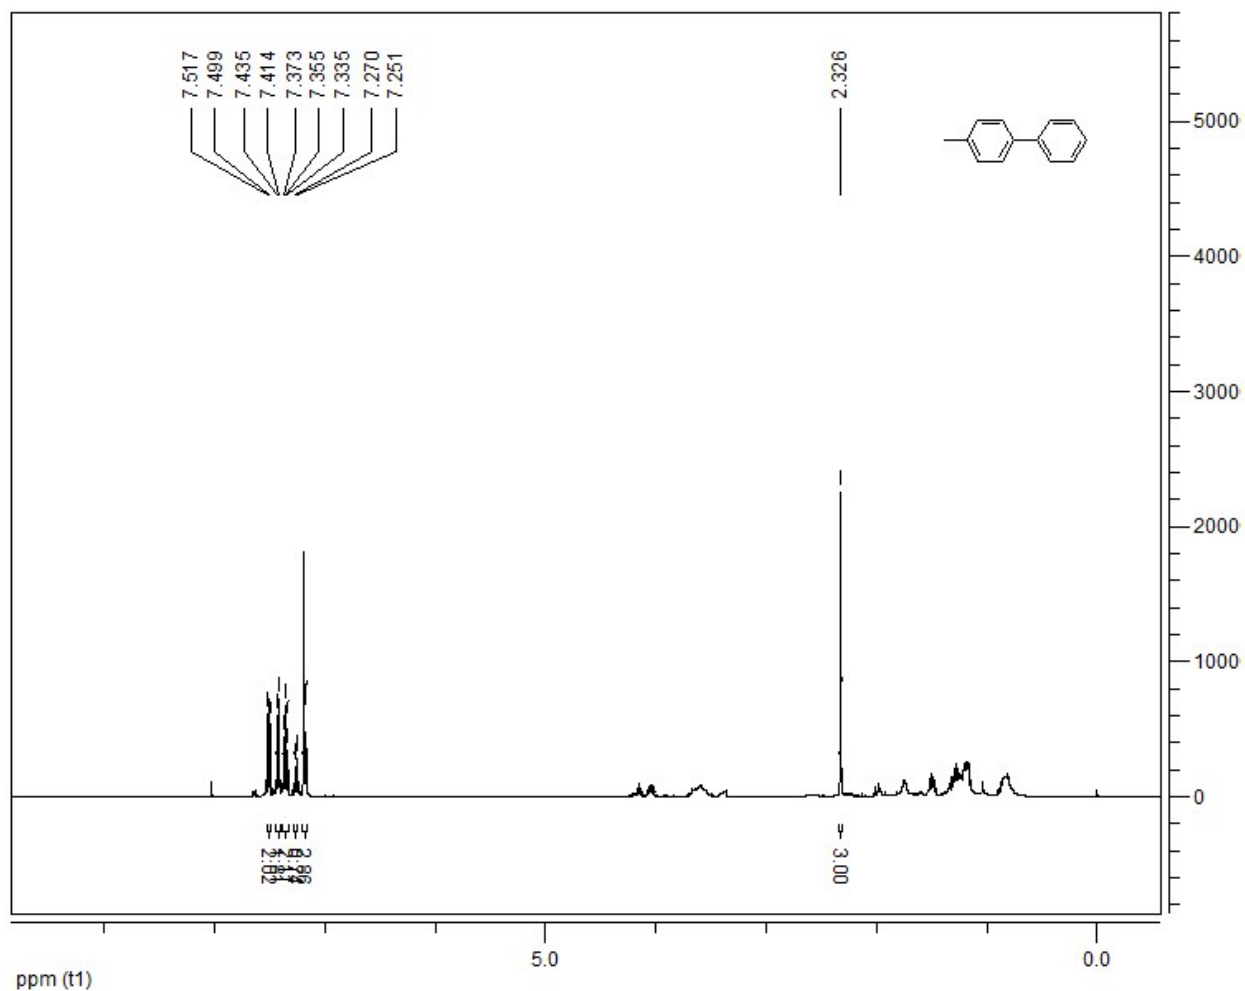

$^1\text{H}$  NMR (400 MHz,  $\text{CDCl}_3$ , ppm, TMS):  $\delta = 7.51$  (m, 4H), 7.42 (d,  $J = 7.5$  Hz, 2H), 7.35 (t,  $J = 8$  Hz,  $J = 7.2$ , 1H), 7.26 (m, 2H), 2.32 (s, 3H)



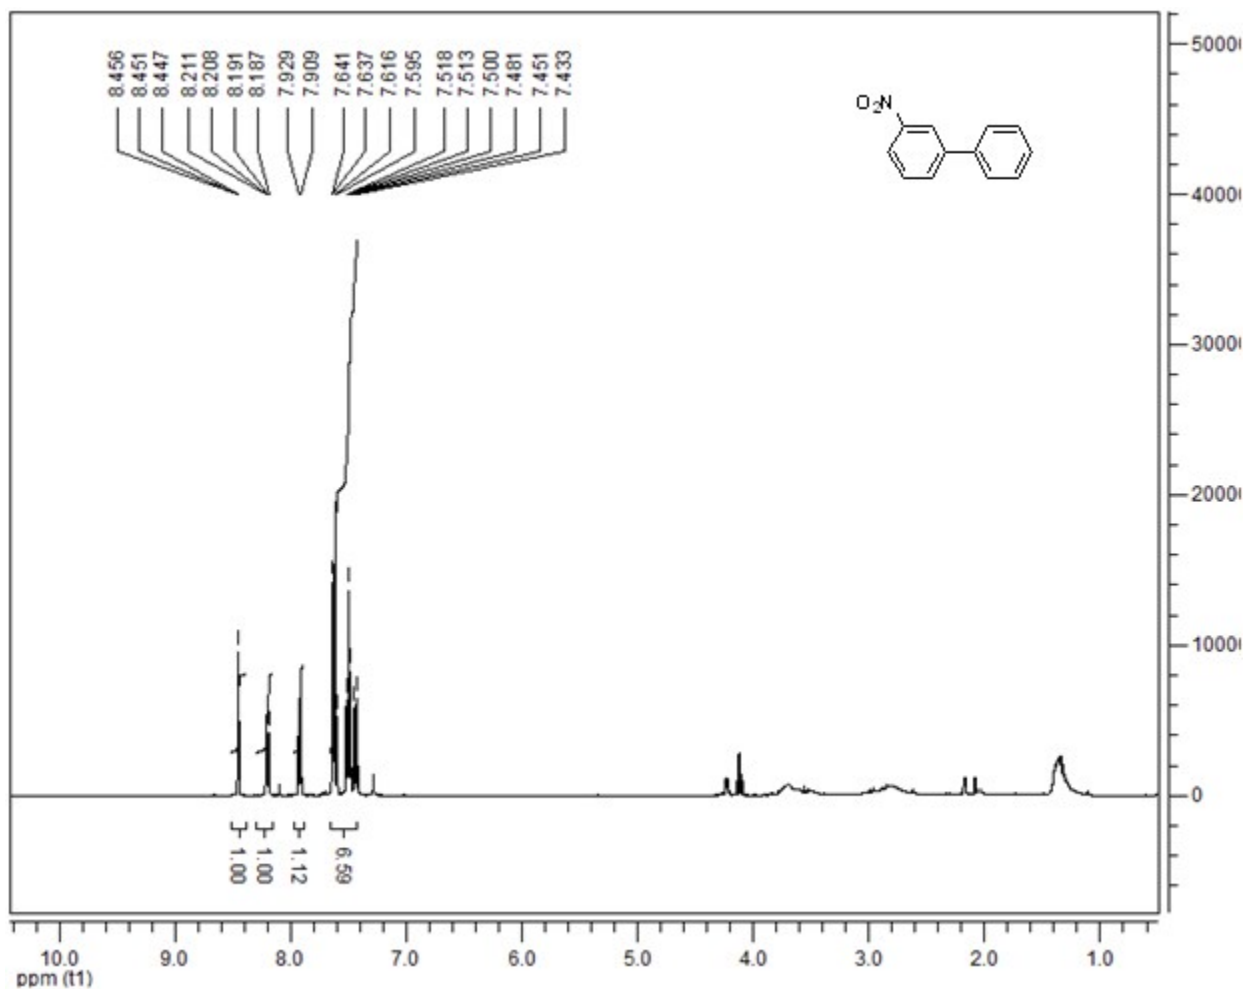

White solid, melting point: 60-61°C

$^1\text{H NMR}$  (400 MHz,  $\text{CDCl}_3$ , ppm, TMS):  $\delta = 8.45$  (s, 1H), 8.19 (dd,  $J = 8/1$ ,  $J = 0/89$ , 1H), 7.91(d,  $J=8$  Hz, 1H), 7.59-7.64 (m, 3H), 7.48-7.51(m, 2H), 7.41-7.45 (m, 1H)

IR (KBr,  $\text{cm}^{-1}$ ):  $\nu = 3198, 1583, 1519, 1340, 1293, 1082, 771, 791, 689$

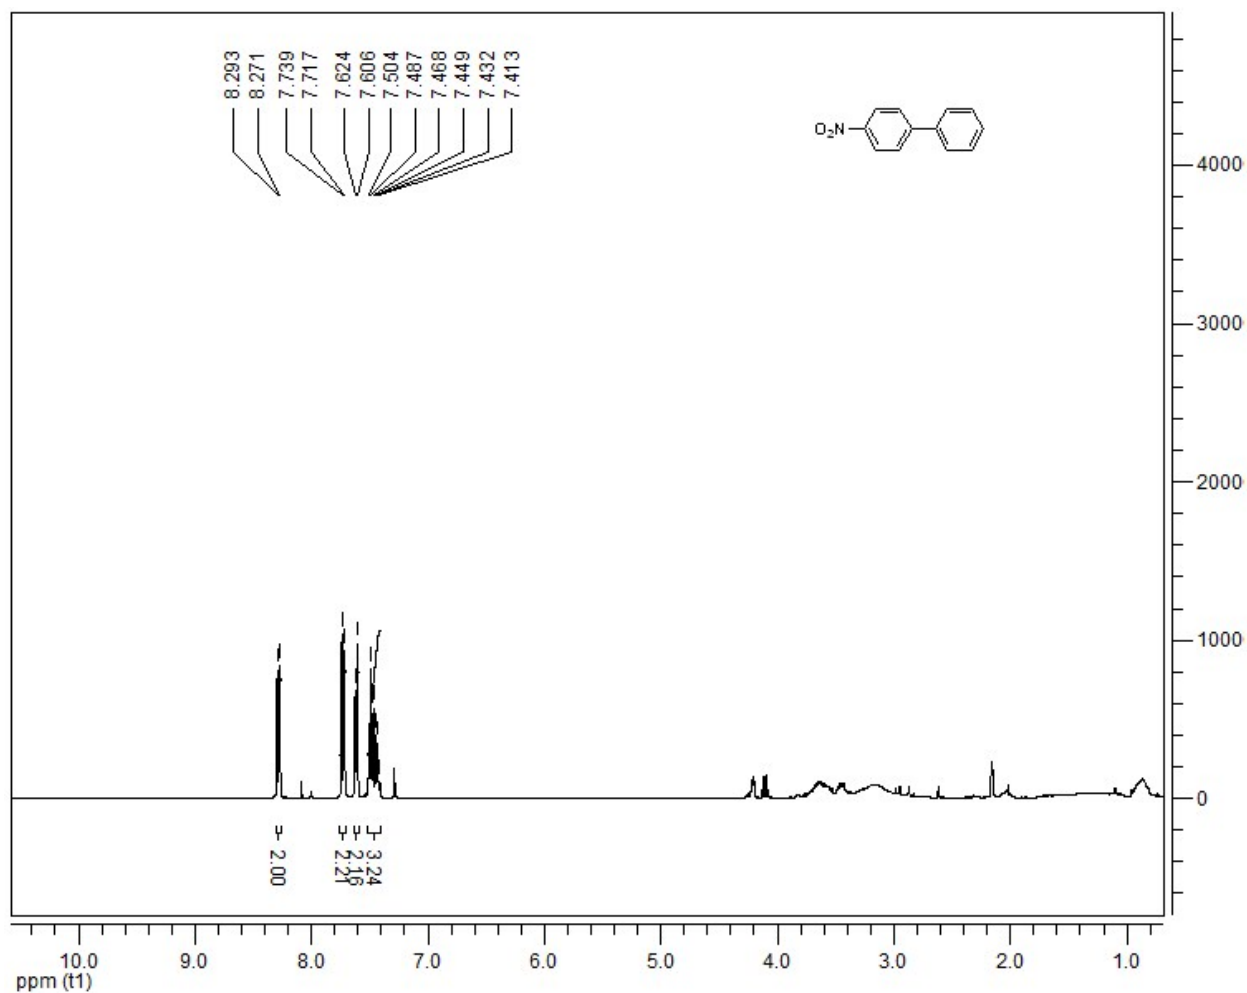

White solid, melting point: 88°C

$^1\text{H NMR}$  (400 MHz,  $\text{CDCl}_3$ , ppm, TMS):  $\delta = 8.28(\text{d}, J = 8 \text{ Hz}, 2\text{H}), 7.72(\text{d}, J = 8.8 \text{ Hz}, 2\text{H}), 7.60-7.62(\text{m}, 2\text{H}), 7.50-7.43(\text{m}, 3\text{H})$

FT-IR (KBr,  $\text{cm}^{-1}$ ):  $\nu = 3363, 3242, 1596, 1513, 1351, 853, 739, 711$ .

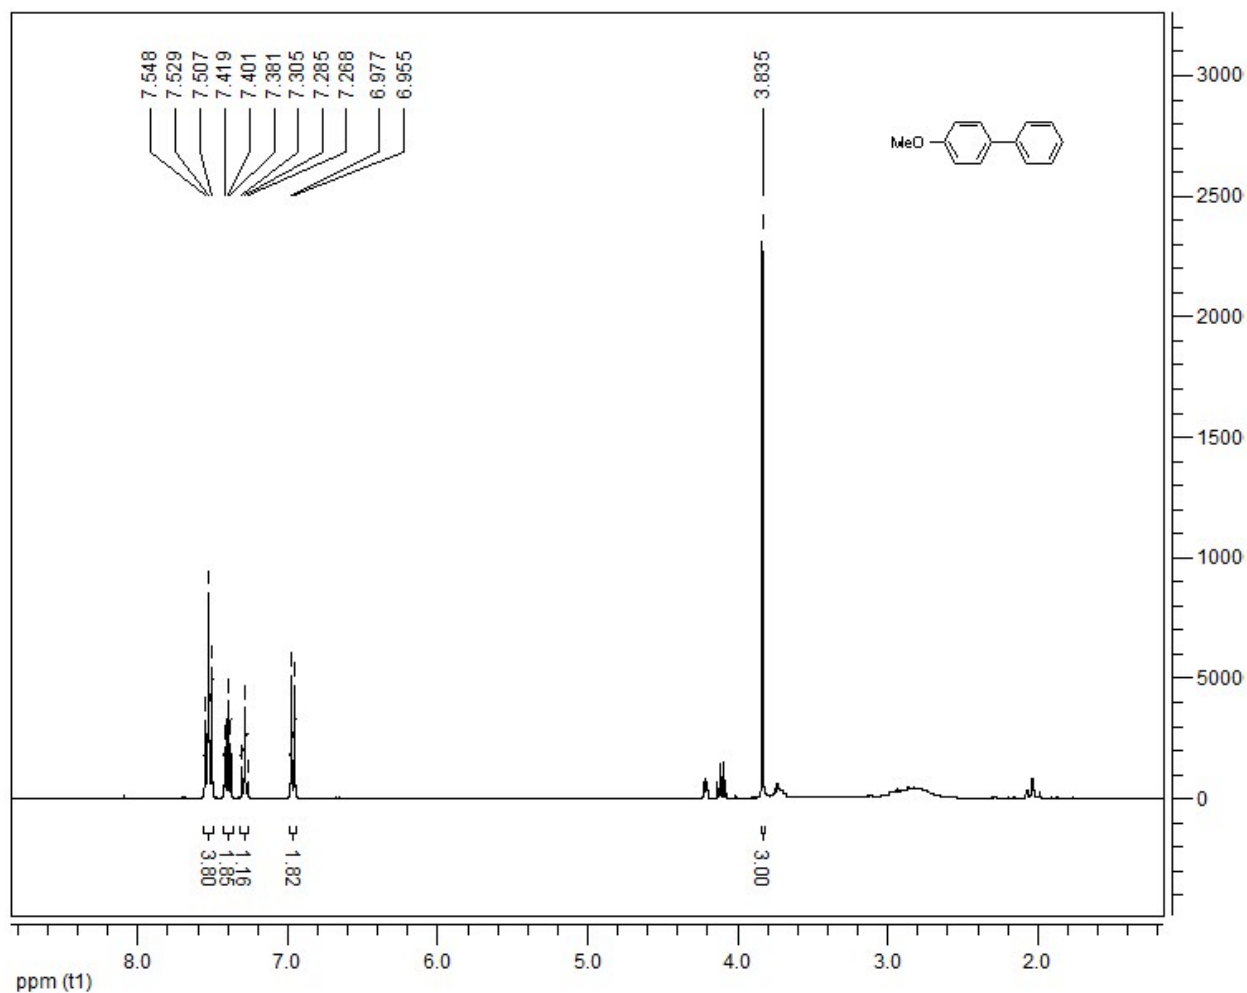

White solid, melting point: 87°C

$^1\text{H NMR}$  (400 MHz,  $\text{CDCl}_3$ , ppm, TMS):  $\delta = 7.50\text{-}7.54$  (m, 4H), 7.39 (t,  $J = 12$  Hz, 2H), 7.28 (t, 1H), 6.96 (d,  $J = 8.8$ , 2H), 3.83 (s, 3H)

IR (KBr,  $\text{cm}^{-1}$ ):  $\nu = 3073, 2963, 2836, 1722, 1578, 1486, 1287, 1247, 1032, 819, 612, 507$

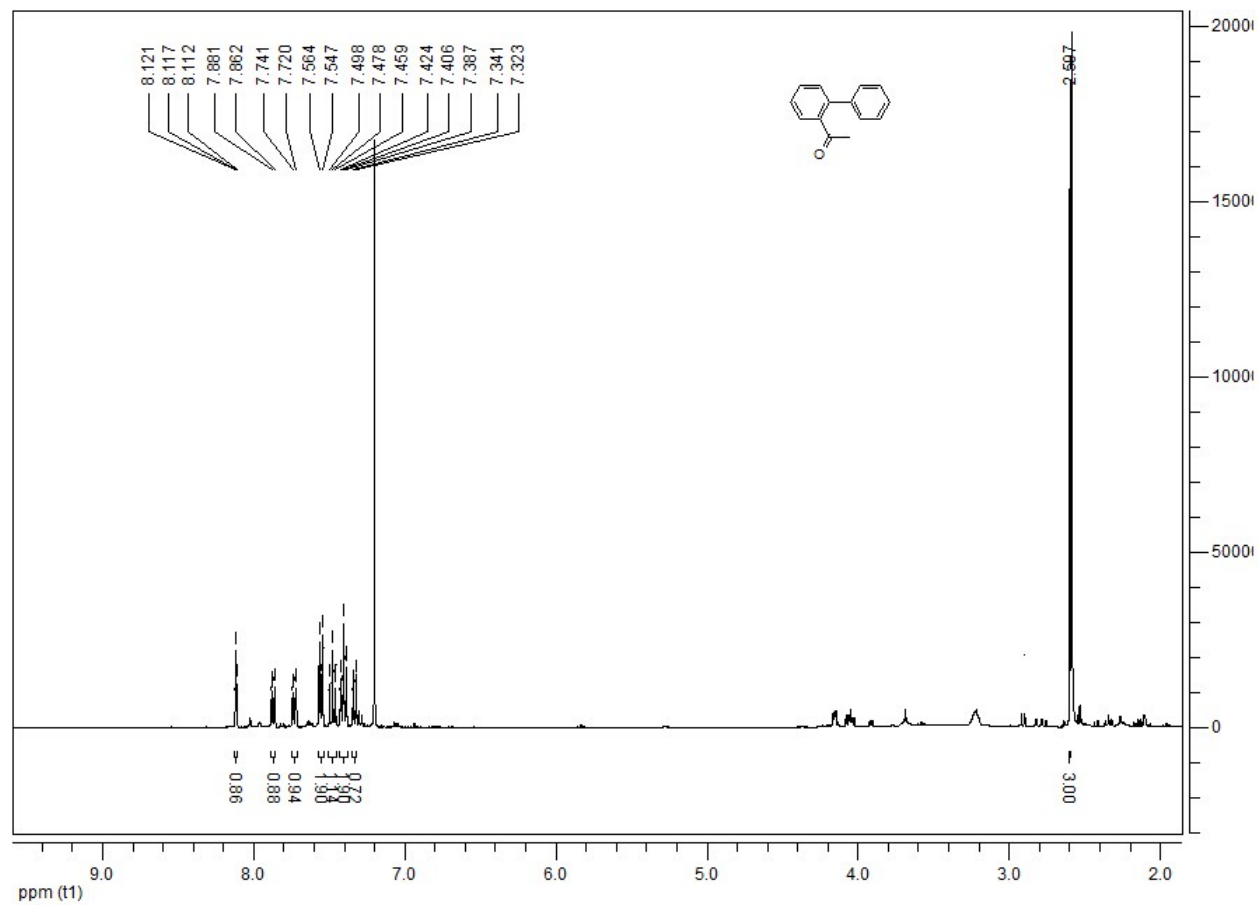

$^1\text{H}$  NMR (400 MHz,  $\text{CDCl}_3$ , ppm, TMS):  $\delta$  = 8.11(t,  $J$ =1.6 Hz,  $J$ = 2Hz, 1H), 7.87(d,  $J$ =7.6 Hz, 1H), 7.73(d,  $J$ =8.4Hz, 1H), 7.55(d,  $J$ =6.8Hz, 2H), 7.48(t,  $J$ =8Hz,  $J$ =7.6Hz, 1H), 7.40(t,  $J$ =7.2Hz,  $J$ =7.6 Hz, 2H), 7.33(d,  $J$ =7.2, 1H)

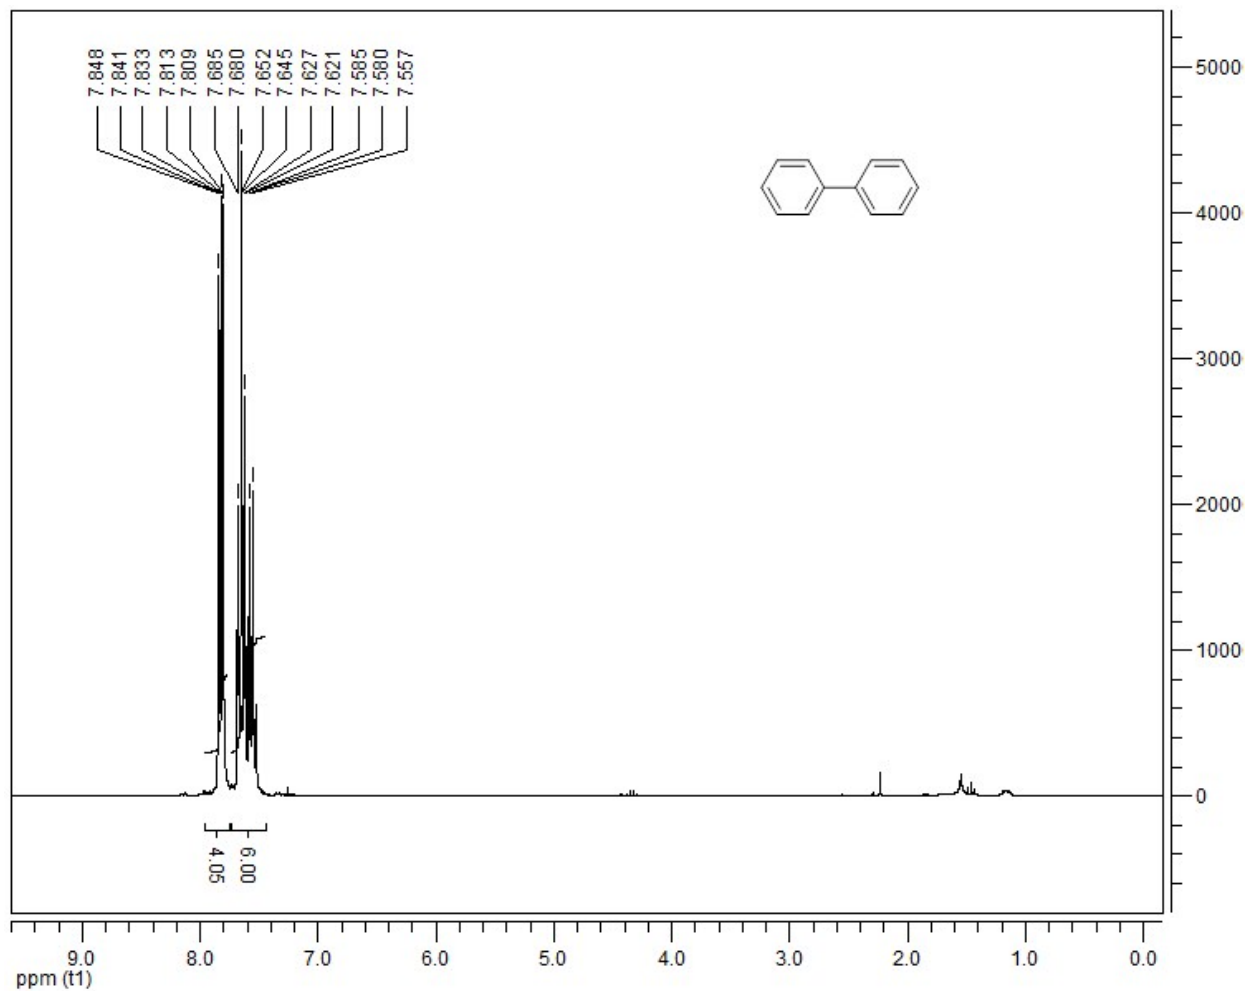

White solid, melting point: 72°C

$^1\text{H}$  NMR (400 MHz,  $\text{CDCl}_3$ , ppm, TMS):  $\delta$  = 7.84-7.80 (m, 4H), 7.55-7.68 (m, 6H)

IR (KBr,  $\text{cm}^{-1}$ ):  $\nu$  = 1602, 1440, 1368, 1345, 1306, 1088, 728, 690, 578.
